# Supplementary material for: Transformation of phytosterols into pregnatetraenedione by a combined microbial and chemical process
Source: Royal Society of Chemistry journal article supplement (doi:10.1039/d1gc04819h), 2022-01-01
Supplement: d1gc04819h1.pdf [file d1gc04819h1.pdf]

## Supporting Information

### **Transformation of phytosterols to pregnatetraenedione by a combined microbial and chemical process**

Yong-Jun Liu,<sup>a</sup> Wei-ting Ji,<sup>a</sup> Lu Song,<sup>a</sup> Xin-Yi Tao,<sup>a</sup> Ming Zhao,<sup>a</sup> Bei Gao,<sup>a</sup> Hao Meng,<sup>b</sup> Feng-Qing Wang\*<sup>a</sup> and Dong-Zhi Wei<sup>a</sup>

<sup>a</sup> *State Key Laboratory of Bioreactor Engineering, Newworld Institute of Biotechnology, East China University of Science and Technology, Shanghai 200237, China*

<sup>b</sup> *Hunan Norchem Pharmaceutical Co. Ltd., Changde 415400, China*

#### **\* Corresponding author**

Feng-Qing Wang

Tel.: +86 21 64253278; fax: +86 21 64250068; E-mail address: fqwang@ecust.edu.cn

Table S1 primers used in this work

| <b>Primers</b>                           |                                                                              |            |
|------------------------------------------|------------------------------------------------------------------------------|------------|
| <b>Gene deletion in mycobacteria</b>     |                                                                              |            |
| pQC-ltp2-U-F&R                           | TATActgcagACCAGGCTCGCCATCAACGGGGTC/<br>GACCaagcttATCCACGGCATGAACGGGATCGCC    | This study |
| pQC-ltp2-D-F&R                           | GCGCaagcttGTCCATCGTGAAGGTGACCAGACC/<br>TATAgcggccgcGAGATGGACTGGCGCATCATGAAG  | This study |
| pQC-igr-U-F&R                            | GCACaagcttCGCGTTCTCGTCGACGTTTCGGCCAC/<br>TATAgaattcCCGTCGCGCGGTCCACCGGCATCGG | This study |
| pQC-igr-D-F&R                            | GCGCgaattcCATGTTGAGCAGGACGGCCTTCTGC/<br>ATCGg gatccCGTCGAGGTGGTAGTAGGTCTCGGC | This study |
| pQC-E1E2-U-F&R                           | GGCAggtaccCACCGTAGATCTGCAGTTCGGGCA/<br>GCTAgaattcCAGTCCGAGCCCGTCACCACCGAG    | This study |
| pQC-E1E2-D-F&R                           | TAGCgaattcCTCGGGCACCGCCAGCGCCGCCAC/<br>TATAgcggccgcATCCCGGTCTGGCCGCAGGAGATG  | This study |
| pQC-H1H2-U-F&R                           | TATActgcagTGCCGCAGAAGCCGAGCTCCTCGA/<br>GCGCaagcttGACACCATCACCTTCAGTGGTGAG    | This study |
| pQC-H1H2-D-F&R                           | TAGCaagcttGACGATACCCGGATGACCTGCGGC/<br>TATAgcggccgcCGATCGAGCAGCAGATCTTCATCA  | This study |
| <b>Gene augmentation in mycobacteria</b> |                                                                              |            |

|             |                                                                                                                     |            |
|-------------|---------------------------------------------------------------------------------------------------------------------|------------|
| H1H2- F&R   | ATATgaattcGTGAGCGAACTGCAGGCGGGTATCG/<br>AATTatcgatTCACTTGTCCCCAGGGTGAGCGTC                                          | This study |
| Ltp2- F&R   | AATTggatccGGTGACATCGTCCGGAAAGGCCGG/<br>AATTaagcttTCAGCCGAGGATCAGACCCGATGTCTG                                        | This study |
| Cyp125- F&R | AATTgaattcGTGGTACTAGAAGGAATTGTCTCGGCA<br>CCCGTCG/<br>AATTaagcttCTAGCTCGAGGCGCCGGCGC                                 | This study |
| A1-F&R      | TGCagaattcGTGACTACCGAGACAGCCGGCA/<br>AGTAaagcttTCAGCTCGGCTGAGCCGGTT                                                 | This study |
| 4A-F&R      | TAGCctgcagAAATGAACGACAACCCGATCGACCTGT<br>/<br>GCGCaagcttTCAAGAACCCATGAGCTCAGTTGCG                                   | This study |
| A5-F&R      | AATTggatccAATGGGTAATCCTGTCATCGTCGAAGC<br>C/<br>AATTgaattcTTAGATCCGCTCGATGATGGTGCCCG                                 | This study |
| A14A-F&R    | CTCAGCCGAGCTGAGAATTCGAGAAGGAGATATA<br>ATGAACGACAACCCGATC/<br>GTTAACTACGTCGACATCGATATCAAGAACCCATG<br>AGCTCAGTTGCGGAG | This study |
| E1E2-F&R    | CGGATCCAGCTGCAGAATTCGTGGACTTCACGCCG<br>AAGCCCG/<br>CGTCGACATCGATAAGCTTTCACCGGGTCACCCTC<br>GGCAC                     | This study |
| A1E1E2-F&R  | CTAAaagcttGAGAAGGAGATATAGTGACTACCGAG<br>ACAGCCGGC/<br>AATTgtaacTCAGCTCGGCTGAGCCGGTTC                                | This study |

|            |                                                                                              |            |
|------------|----------------------------------------------------------------------------------------------|------------|
| 4AE1E2-F&R | GTGAaagcttGAGAAGGAGATATAATGAACGACAAC<br>CCGATC/<br>AATTgtaacTCAAGAACCCATGAGCTCAGTTGCGGA<br>G | This study |
|------------|----------------------------------------------------------------------------------------------|------------|

Note: all sequences of primers were showed in 5'-3'; the lowercase letters indicated the restriction sites.

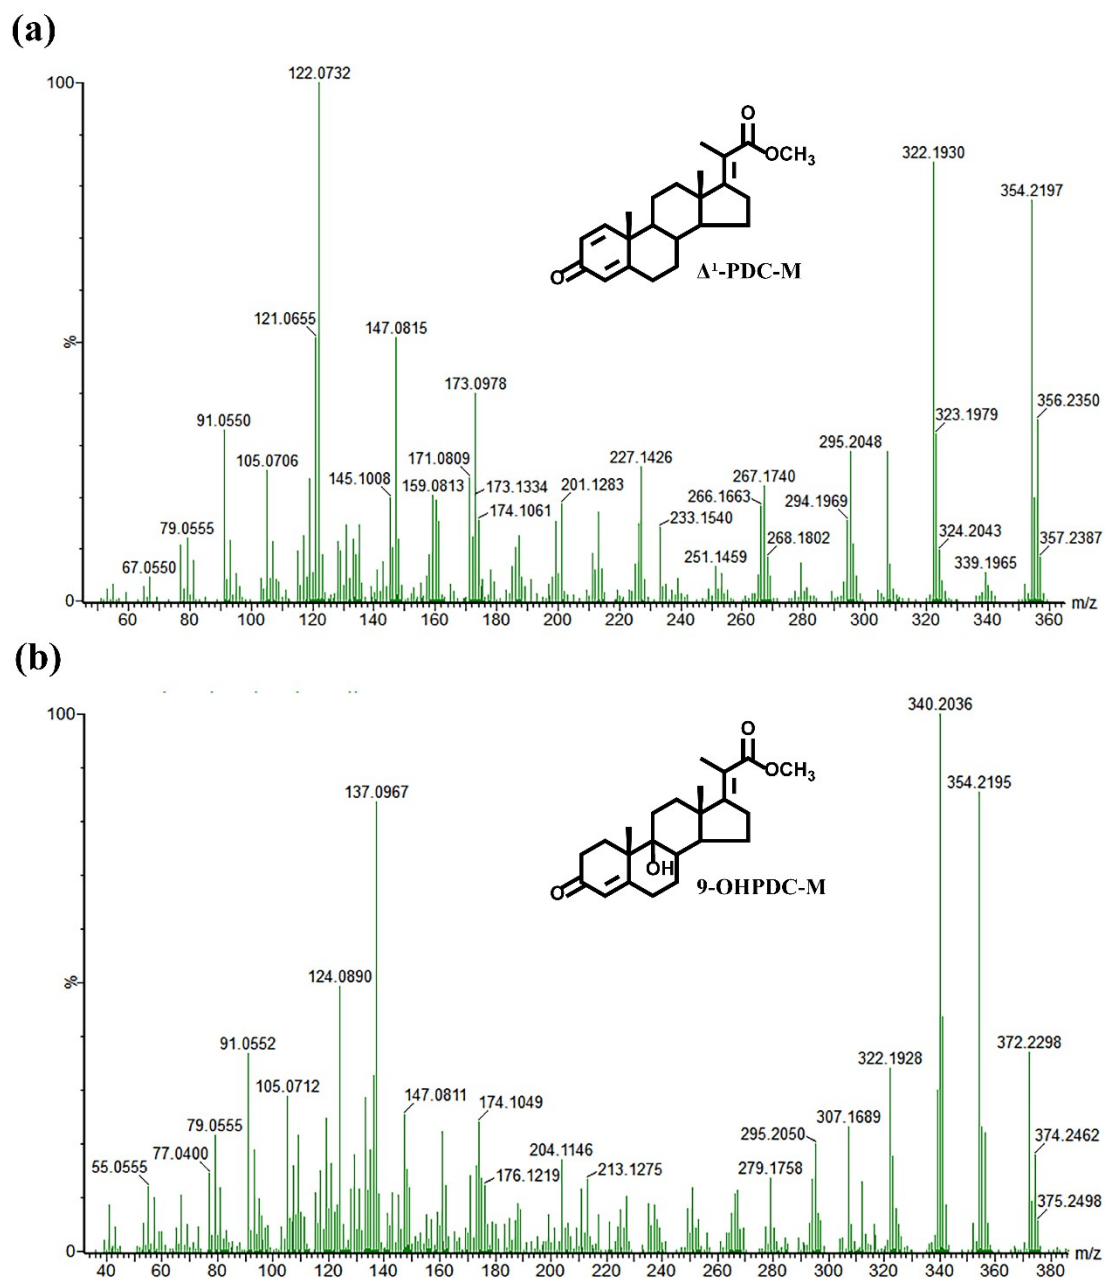

Fig. S1 The mass spectrometry data of  $\Delta^1$ -PDC-M and 9-OHPDC-M. (a) MS data of  $\Delta^1$ -PDC-M, EI: 354.2197[M]<sup>+</sup>; (b) MS data of 9-OHPDC-M, EI: 372.2298[M]<sup>+</sup>.

(a)

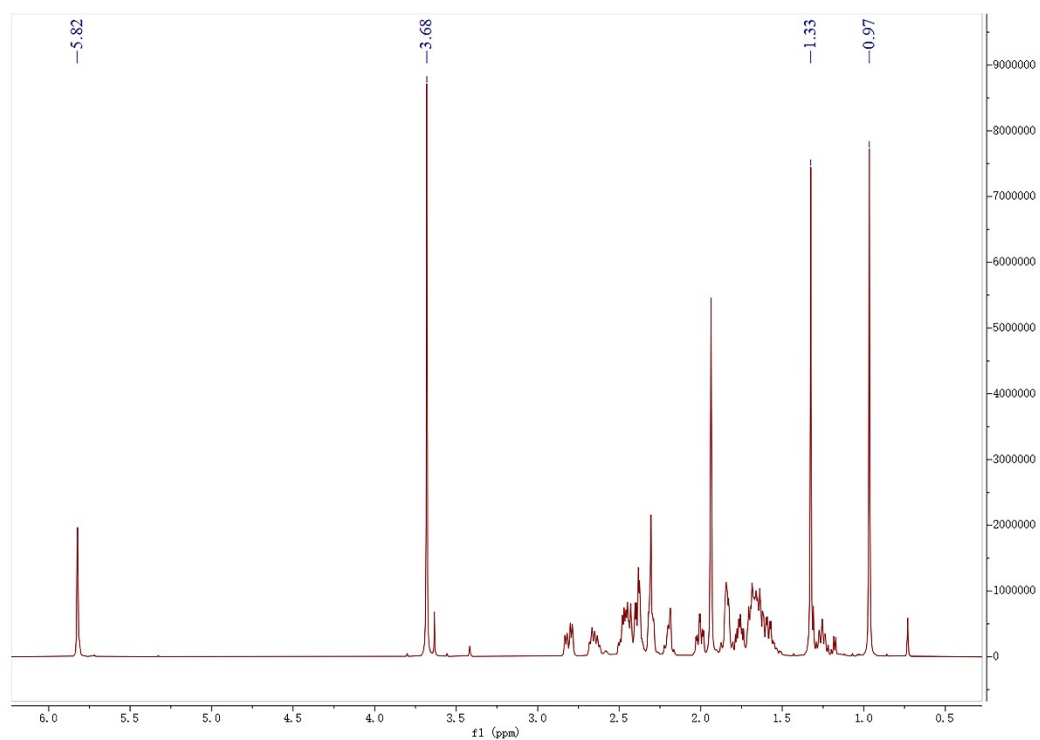

(b)

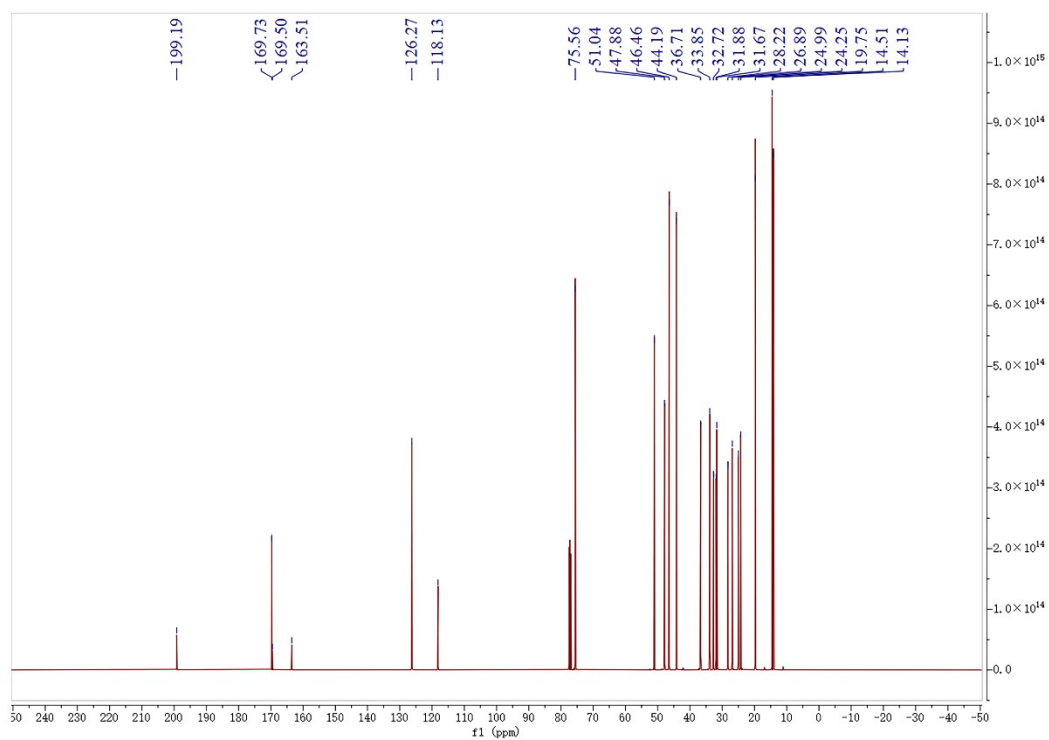

Fig. S2 NMR data of 9-OHPDC-M. (a)  $^1\text{H}$  NMR of 9-OHPDC-M; (b)  $^{13}\text{C}$  NMR of 9-OHPDC-M.

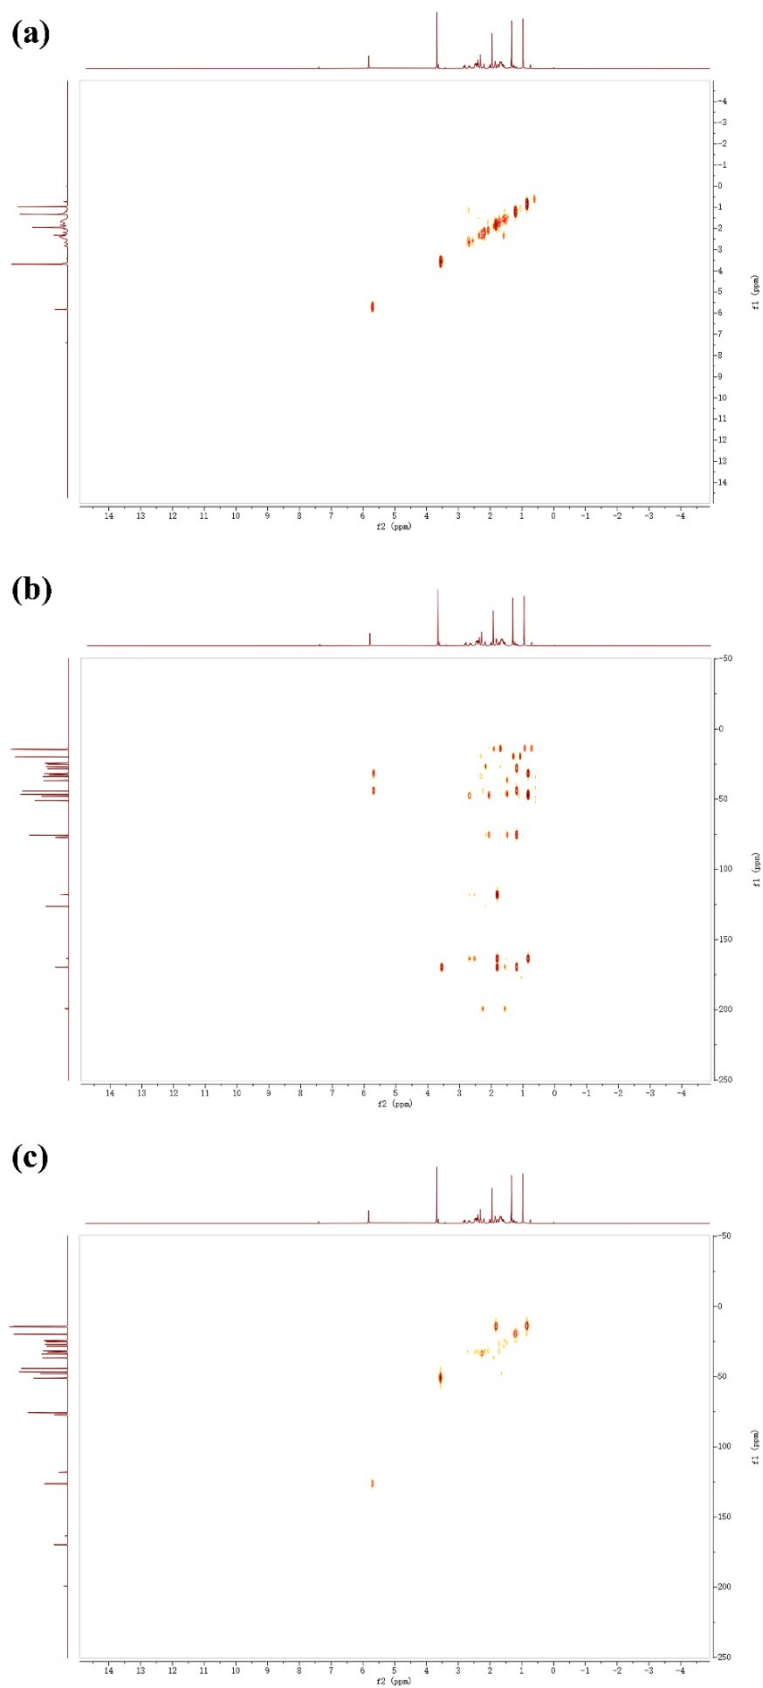

Fig. S3 2D NMR spectra data of 9-OHPDC-M. (a) COSY of 9-OHPDC-M; (b) HMBC of 9-OHPDC-M; (c) HMQC of 9-OHPDC-M.

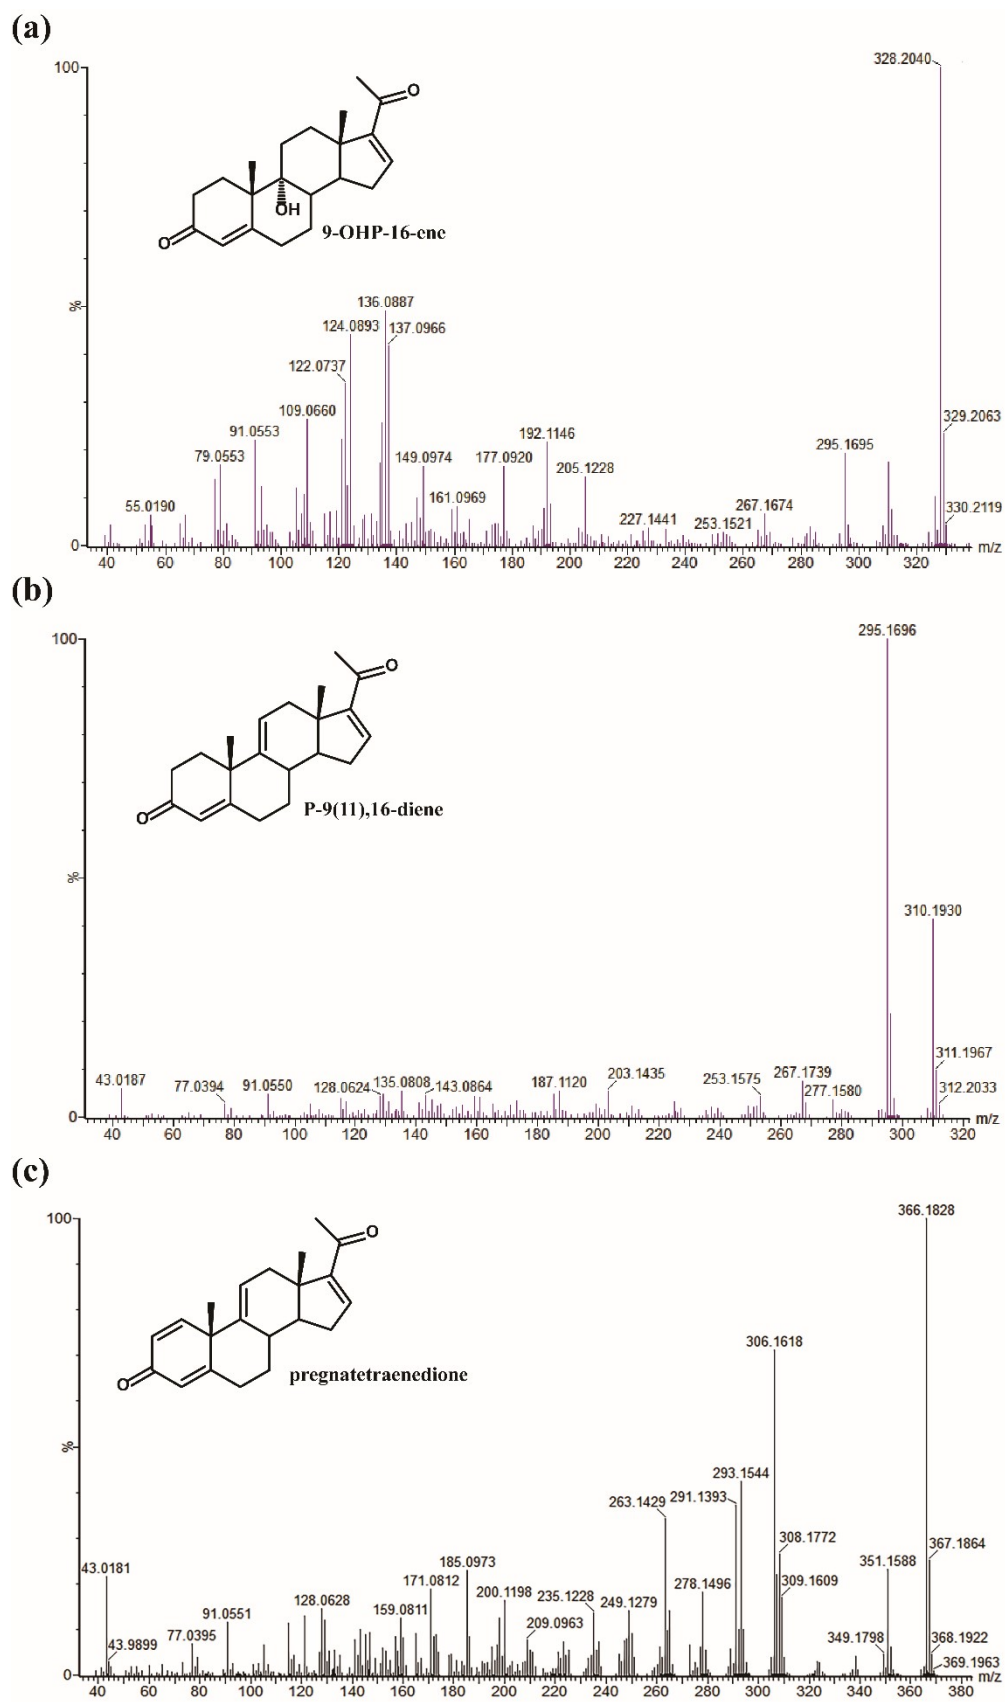

Fig. S4 Mass spectrometry data of 9-OHP-16-ene, P-9(11),16-diene and Pregnatetraenedione.



(a)

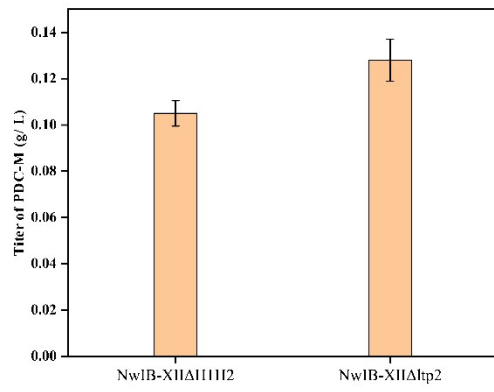

(b)

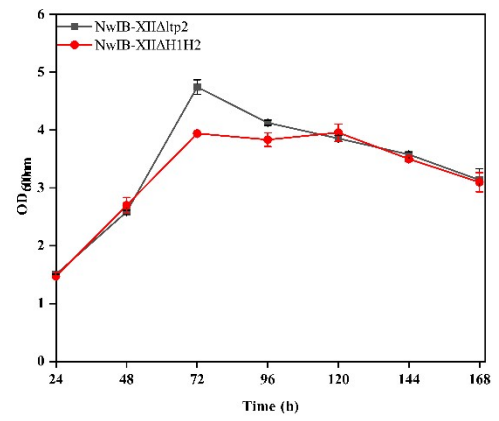

Fig. S5 Comparison of NwIB-XIIΔtp2 and NwIB-XIIΔH1-H2 in conversion of phytosterols in MYC/02.

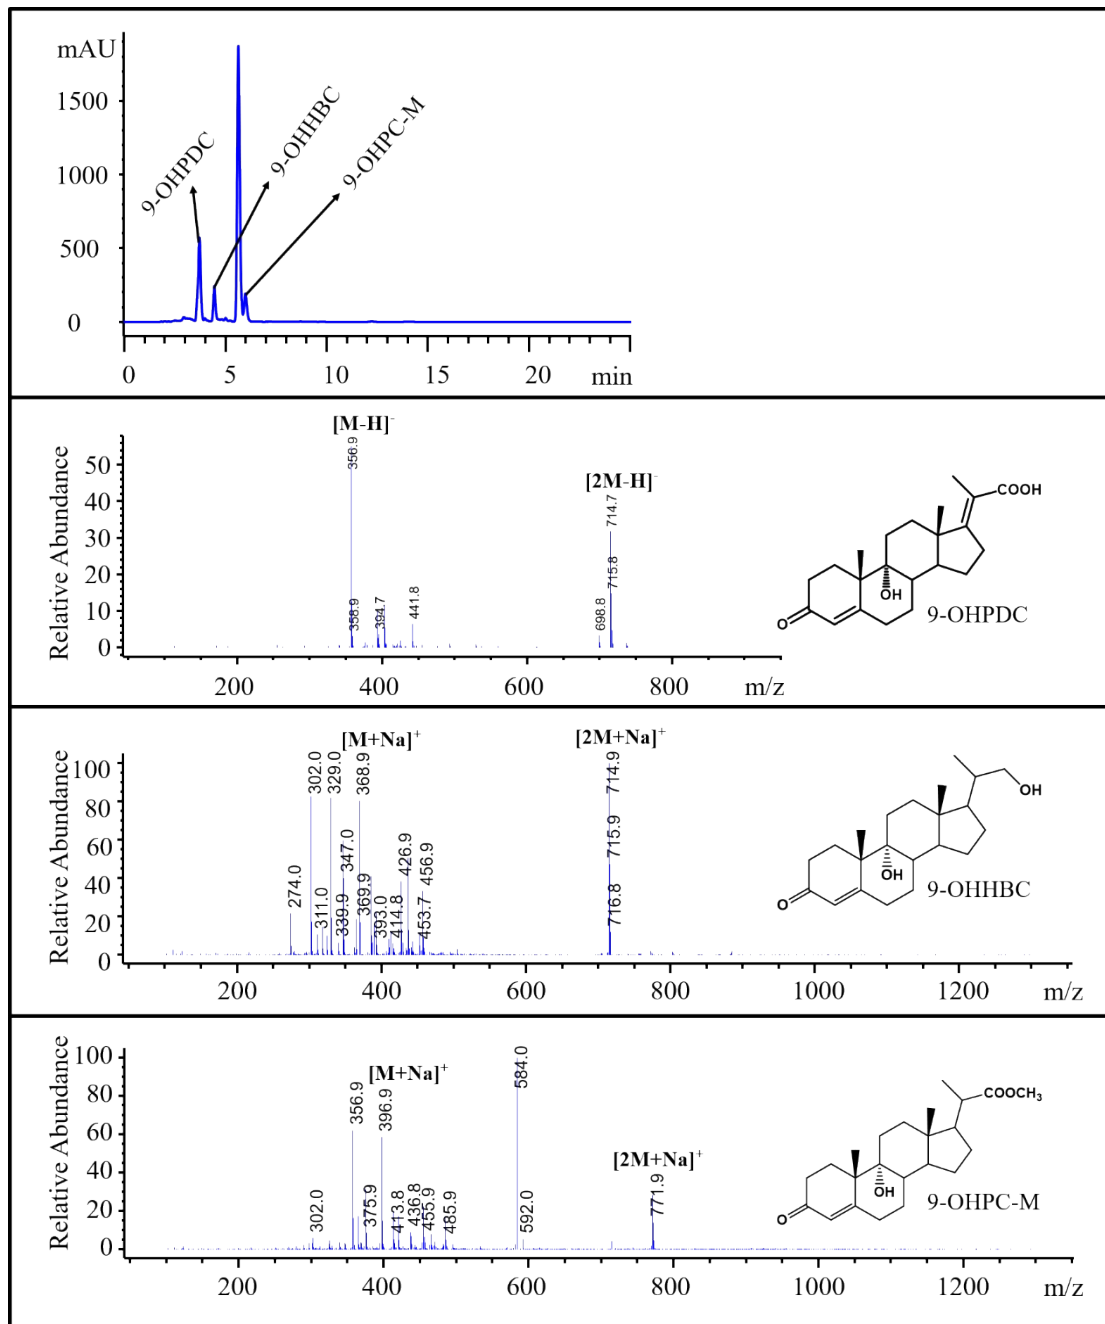

Fig. S6 LC-MS data of the minor metabolites resulted from NwIB- $\Delta$ ltp2 in the MYC/02 with phytosterols. The molecular weight of 9-OHPDC, 9-OHHBC and 9-OHPC-M was determined as m/z 357.9, m/z 345.9 and m/z 374.5, respectively. 9-OHPDC: 9 $\alpha$ -hydroxy-3-oxopregna-4,17(20)-diene-20-carboxylic acid; 9-OHHBC: 9,22-dihydroxy-23,24-bisnorchol-4-ene-3-one; 9-OHPC-M: 3-oxopregn-4-ene-20-carboxylic acid methyl ester.
